# Supplementary material for: Access to Care, Cost of Care, and Satisfaction With Care Among Adults With Private and Public Health Insurance in the US
Source: PubMed Central journal article supplement (PMC8170543; doi:10.1001/jamanetworkopen.2021.10275), 2021-06-01
Supplement: jamanetwopen-e2110275-s001.pdf [file jamanetwopen-e2110275-s001.pdf]

## Supplementary Online Content

Wray CM, Khare M, Keyhani S. Access to care, cost of care, and satisfaction with care among adults with private and public health insurance in the US. *JAMA Netw Open*. 2021;4(6):e2110275. doi:10.1001/jamanetworkopen.2021.10275

**eTable 1.** Comparison Employer Sponsored Health Insurance to Medicare on Access, Cost and Satisfaction With Care After Accounting for Health Status, N = 114 124

**eTable 2.** Comparisons of Individually Purchased Private Insurance to Medicare on Access to Care, Cost of Care and Satisfaction With Care After Accounting for Health Status, N = 66 098

**eTable 3.** Comparison Employer Sponsored Health Insurance to Medicaid on Access, Cost and Satisfaction With Care After Accounting for Health Status, N = 77 582

**eTable 4.** Comparisons of Individually Purchased Private Insurance to Medicaid on Access to Care, Cost of Care and Satisfaction With Care After Accounting for Health Status, N = 29 556

**eTable 5.** Comparison Employer Sponsored Health Insurance to VA/Military on Access, Cost and Satisfaction With Care After Accounting for Health Status, N = 70 992

**eTable 6.** Comparisons of Individually Purchased Private Insurance to VA/Military on Access to Care, Cost of Care and Satisfaction With Care After Accounting for Health Status, N = 22 986

This supplementary material has been provided by the authors to give readers additional information about their work.

**eTable 1. Comparison Employer Sponsored Health Insurance to Medicare on Access, Cost and Satisfaction With Care After Accounting for Health Status\*, N = 114 124**

|                                                                                              | Access to Care                     |                                   | Costs of Care                          |                                     |                                    | Satisfaction with Care             |
|----------------------------------------------------------------------------------------------|------------------------------------|-----------------------------------|----------------------------------------|-------------------------------------|------------------------------------|------------------------------------|
|                                                                                              | Has a personal doctor              | Instability in insurance coverage | Difficulty seeing a doctor due to cost | Not taking medications due to costs | Reported medical debt              | Very satisfied with care***        |
| N**                                                                                          | 113,852                            | 113,996                           | 113,942                                | 107,059                             | 113,510                            | 112,144                            |
|                                                                                              | Unadjusted OR (95% CI)             |                                   |                                        |                                     |                                    |                                    |
|                                                                                              | Adjusted OR (95% CI) **            |                                   |                                        |                                     |                                    |                                    |
| Employer Sponsored Insurance Compared to Medicare                                            | 0.38(0.35,0.41)<br>0.52(0.48,0.57) | 1.38(1.19,1.6)<br>1.54(1.3,1.83)  | 1.04(0.95,1.14)<br>2.00(1.77,2.27)     | 0.66 (0.60,0.73)<br>1.44(1.27,1.62) | 1.65(1.55,1.76)<br>2.92(2.69,3.17) | 0.76(0.72,0.81)<br>0.60(0.56,0.64) |
|                                                                                              | Adjusted OR (95% CI) **            |                                   |                                        |                                     |                                    |                                    |
| <b>Self-Reported Health</b>                                                                  |                                    |                                   |                                        |                                     |                                    |                                    |
| Excellent/Very good/Good (reference)                                                         |                                    |                                   |                                        |                                     |                                    |                                    |
| Fair/poor                                                                                    | 0.58(0.54,0.64)                    | 0.58(0.53,0.64)                   | 0.56(0.52,0.62)                        | 0.59(0.54,0.64)                     | 0.53(0.49,0.58)                    | 0.55(0.50,0.60)                    |
| <b>Number of Visits to the Doctor, Nurse, or Other Health Professional in Past 12 Months</b> |                                    |                                   |                                        |                                     |                                    |                                    |
| None (reference)                                                                             |                                    |                                   |                                        |                                     |                                    |                                    |
| 1-2                                                                                          | 0.79(0.70,0.90)                    | 0.67(0.59,0.76)                   | 0.68(0.6,0.77)                         | 0.65(0.56,0.75)                     | 0.65(0.57,0.74)                    | 0.72(0.63,0.83)                    |
| >2                                                                                           | 0.66(0.58,0.75)                    | 0.54(0.48,0.61)                   | 0.54(0.48,0.61)                        | 0.53(0.46,0.61)                     | 0.49(0.43,0.55)                    | 0.58(0.51,0.66)                    |
| <b>Number of Comorbid Conditions</b>                                                         |                                    |                                   |                                        |                                     |                                    |                                    |
| None (reference)                                                                             |                                    |                                   |                                        |                                     |                                    |                                    |
| 1                                                                                            | 0.64(0.61,0.69)                    | 0.63(0.59,0.67)                   | 0.63(0.59,0.67)                        | 0.61(0.58,0.66)                     | 0.62(0.58,0.66)                    | 0.63(0.59,0.67)                    |
| 2                                                                                            | 0.36(0.33,0.4)                     | 0.35(0.32,0.38)                   | 0.35(0.32,0.38)                        | 0.34(0.31,0.38)                     | 0.34(0.31,0.37)                    | 0.35(0.32,0.38)                    |
| >2                                                                                           | 0.26(0.23,0.3)                     | 0.25(0.22,0.28)                   | 0.25(0.22,0.29)                        | 0.24(0.21,0.28)                     | 0.24(0.21,0.27)                    | 0.25(0.22,0.29)                    |
| <b>Number of Functional Impairments</b>                                                      |                                    |                                   |                                        |                                     |                                    |                                    |
| None (reference)                                                                             |                                    |                                   |                                        |                                     |                                    |                                    |
| 1                                                                                            | 0.39(0.36,0.43)                    | 0.39(0.36,0.42)                   | 0.37(0.34,0.41)                        | 0.39(0.35,0.42)                     | 0.36(0.33,0.4)                     | 0.38(0.34,0.41)                    |
| >1                                                                                           | 0.24(0.22,0.28)                    | 0.24(0.21,0.27)                   | 0.22(0.19,0.24)                        | 0.23(0.21,0.26)                     | 0.21(0.18,0.23)                    | 0.23(0.20,0.25)                    |

\* Questions posed in BRFSS on access, costs and satisfaction with care:

-Do you have one person you think of as your personal doctor or health care provider?

-In the past 12 months is there any time when you did not have any health insurance or coverage? (instability in insurance coverage)

-Was there a time in the past 12 months when you needed to see a doctor but could not because of cost? (difficulty seeing a doctor due to cost)

-In the past 12 months, was there a time when you did not take your prescription medications due to cost? (not taking Medication due to cost)

-Do you currently have any health care bills that are being paid off over time? (medical debt)

-In general, how satisfied are you with the care you received? Response categorization: Very satisfied versus somewhat satisfied/not satisfied (Very satisfied with care)

\*\*Adjusted for number of comorbid conditions, number of functional impairments and number of visits. Missing data was dropped from the analyses.

**eTable 2. Comparisons of Individually Purchased Private Insurance to Medicare on Access to Care, Cost of Care and Satisfaction With Care After Accounting for Health Status\*, N = 66 098**

|                                                                                              | Access to Care                     |                                    | Costs of Care                          |                                     |                                    | Satisfaction with Care             |
|----------------------------------------------------------------------------------------------|------------------------------------|------------------------------------|----------------------------------------|-------------------------------------|------------------------------------|------------------------------------|
|                                                                                              | Has a personal doctor              | Instability in insurance coverage  | Difficulty seeing a doctor due to cost | Not taking medications due to costs | Reported medical debt              | Very satisfied with care***        |
| N**                                                                                          | 65,882                             | 66,004                             | 65,965                                 | 62,883                              | 65,647                             | 64,887                             |
|                                                                                              | Unadjusted OR (95% CI)             |                                    |                                        |                                     |                                    |                                    |
|                                                                                              | Adjusted OR (95% CI)               |                                    |                                        |                                     |                                    |                                    |
| Individually Purchased Private Insurance Compared to Medicare                                | 0.36(0.32,0.40)<br>0.50(0.44,0.57) | 2.68(2.23,3.22)<br>2.56(2.11,3.12) | 1.37(1.21,1.55)<br>1.97(1.70,2.28)     | 0.99(0.87,1.14)<br>1.64(1.40,1.92)  | 1.55(1.41,1.71)<br>2.34(2.09,2.63) | 0.68(0.63,0.74)<br>0.59(0.54,0.65) |
|                                                                                              | Adjusted OR (95% CI)**             |                                    |                                        |                                     |                                    |                                    |
| <b>Self-Reported Health</b>                                                                  |                                    |                                    |                                        |                                     |                                    |                                    |
| Excellent/Very good/Good (reference)                                                         |                                    |                                    |                                        |                                     |                                    |                                    |
| Fair/poor                                                                                    | 0.77(0.69,0.86)                    | 0.77(0.69,0.87)                    | 0.75(0.67,0.84)                        | 0.76(0.68,0.85)                     | 0.74(0.65,0.83)                    | 0.73(0.65,0.82)                    |
| <b>Number of Visits to the Doctor, Nurse, or Other Health Professional in Past 12 Months</b> |                                    |                                    |                                        |                                     |                                    |                                    |
| None (reference)                                                                             |                                    |                                    |                                        |                                     |                                    |                                    |
| 1-2                                                                                          | 0.75(0.63,0.89)                    | 0.62(0.52,0.73)                    | 0.62(0.52,0.73)                        | 0.61(0.51,0.74)                     | 0.59(0.50,0.70)                    | 0.69(0.58,0.83)                    |
| >2                                                                                           | 0.61(0.52,0.73)                    | 0.50(0.42,0.58)                    | 0.48(0.41,0.57)                        | 0.49(0.41,0.58)                     | 0.44(0.37,0.52)                    | 0.55(0.46,0.65)                    |
| <b>Number of Comorbid Conditions</b>                                                         |                                    |                                    |                                        |                                     |                                    |                                    |
| None (reference)                                                                             |                                    |                                    |                                        |                                     |                                    |                                    |
| 1                                                                                            | 0.57(0.52,0.63)                    | 0.56(0.51,0.61)                    | 0.55(0.50,0.60)                        | 0.55(0.50,0.60)                     | 0.55(0.51,0.61)                    | 0.55(0.50,0.61)                    |
| 2                                                                                            | 0.43(0.38,0.49)                    | 0.42(0.37,0.48)                    | 0.41(0.36,0.47)                        | 0.41(0.36,0.46)                     | 0.40(0.35,0.46)                    | 0.42(0.37,0.48)                    |
| >2                                                                                           | 0.32(0.27,0.38)                    | 0.31(0.26,0.37)                    | 0.30(0.25,0.36)                        | 0.29(0.25,0.35)                     | 0.29(0.24,0.35)                    | 0.30(0.25,0.36)                    |
| <b>Number of Functional Impairments</b>                                                      |                                    |                                    |                                        |                                     |                                    |                                    |
| None (reference)                                                                             |                                    |                                    |                                        |                                     |                                    |                                    |
| 1                                                                                            | 0.55(0.49,0.62)                    | 0.54(0.48,0.6)                     | 0.53(0.47,0.59)                        | 0.53(0.48,0.6)                      | 0.52(0.46,0.58)                    | 0.53(0.48,0.60)                    |
| >1                                                                                           | 0.46(0.40,0.54)                    | 0.44(0.37,0.52)                    | 0.41(0.35,0.48)                        | 0.45(0.38,0.53)                     | 0.40(0.34,0.47)                    | 0.43(0.37,0.51)                    |

\* Questions posed in BRFSS on access, costs and satisfaction with care:

-Do you have one person you think of as your personal doctor or health care provider?

-In the past 12 months is there any time when you did not have any health insurance or coverage? (instability in insurance coverage)

-Was there a time in the past 12 months when you needed to see a doctor but could not because of cost? (difficulty seeing a doctor due to cost)

-In the past 12 months, was there a time when you did not take your prescription medications due to cost? (not taking Medication due to cost)

-Do you currently have any health care bills that are being paid off over time? (medical debt)

-In general, how satisfied are you with the care you received? Response categorization: Very satisfied versus somewhat satisfied/not satisfied (Very satisfied with care)

\*\*Adjusted for number of comorbid conditions, number of functional impairments and number of visits.

**eTable 3. Comparison Employer Sponsored Health Insurance to Medicaid on Access, Cost and Satisfaction With Care After Accounting for Health Status\*, N = 77 582**

|                                                                                              | Access to Care                     |                                    | Costs of Care                          |                                     |                                    | Satisfaction with Care             |
|----------------------------------------------------------------------------------------------|------------------------------------|------------------------------------|----------------------------------------|-------------------------------------|------------------------------------|------------------------------------|
|                                                                                              | Has a personal doctor              | Instability in insurance coverage  | Difficulty seeing a doctor due to cost | Not taking medications due to costs | Reported medical debt              | Very satisfied with care***        |
| N**                                                                                          | 77,408                             | 77,464                             | 77,460                                 | 71,567                              | 77,114                             | 76,138                             |
|                                                                                              | Unadjusted OR (95% CI)             |                                    |                                        |                                     |                                    |                                    |
|                                                                                              | Adjusted OR (95% CI) **            |                                    |                                        |                                     |                                    |                                    |
| Employer Sponsored Insurance Compared to Medicaid                                            | 1.19(1.08,1.32)<br>1.58(1.40,1.77) | 0.29(0.26,0.33)<br>0.34(0.29,0.39) | 0.50(0.45,0.56)<br>0.83(0.73,0.95)     | 0.43(0.37,0.49)<br>0.78(0.66,0.92)  | 1.36(1.23,1.51)<br>2.06(1.83,2.32) | 1.21(1.11,1.32)<br>0.96(0.87,1.06) |
|                                                                                              | Adjusted OR (95% CI)**             |                                    |                                        |                                     |                                    |                                    |
| <b>Self-Reported Health</b>                                                                  |                                    |                                    |                                        |                                     |                                    |                                    |
| Excellent/Very good/Good (reference)                                                         |                                    |                                    |                                        |                                     |                                    |                                    |
| Fair/poor                                                                                    | 0.42(0.37,0.48)                    | 0.42(0.38,0.48)                    | 0.42(0.38,0.48)                        | 0.43(0.38,0.48)                     | 0.40(0.35,0.45)                    | 0.41(0.37,0.47)                    |
| <b>Number of Visits to the Doctor, Nurse, or Other Health Professional in Past 12 Months</b> |                                    |                                    |                                        |                                     |                                    |                                    |
| None (reference)                                                                             |                                    |                                    |                                        |                                     |                                    |                                    |
| 1-2                                                                                          | 1.06(0.89,1.27)                    | 1.12(0.93,1.35)                    | 1.20(1.00,1.44)                        | 1.22(0.98,1.51)                     | 1.14(0.95,1.36)                    | 1.21(0.99,1.46)                    |
| >2                                                                                           | 0.79(0.66,0.94)                    | 0.85(0.7,1.02)                     | 0.94(0.79,1.11)                        | 0.95(0.78,1.17)                     | 0.84(0.71,1)                       | 0.95(0.79,1.14)                    |
| <b>Number of Comorbid Conditions</b>                                                         |                                    |                                    |                                        |                                     |                                    |                                    |
| None (reference)                                                                             |                                    |                                    |                                        |                                     |                                    |                                    |
| 1                                                                                            | 0.98(0.88,1.09)                    | 0.99(0.88,1.1)                     | 1.00(0.89,1.11)                        | 1(0.89,1.12)                        | 0.98(0.88,1.09)                    | 1.0(0.90,1.11)                     |
| 2                                                                                            | 0.96(0.83,1.12)                    | 0.97(0.83,1.13)                    | 1.00(0.86,1.16)                        | 1.01(0.87,1.18)                     | 0.99(0.85,1.15)                    | 1.0(0.86,1.17)                     |
| >2                                                                                           | 0.83(0.68,1.01)                    | 0.84(0.68,1.03)                    | 0.87(0.71,1.06)                        | 0.89(0.73,1.09)                     | 0.87(0.72,1.06)                    | 0.9(0.74,1.10)                     |
| <b>Number of Functional Impairments</b>                                                      |                                    |                                    |                                        |                                     |                                    |                                    |
| None (reference)                                                                             |                                    |                                    |                                        |                                     |                                    |                                    |
| 1                                                                                            | 0.41(0.36,0.46)                    | 0.43(0.38,0.49)                    | 0.42(0.37,0.48)                        | 0.42(0.37,0.47)                     | 0.39(0.34,0.45)                    | 0.41(0.36,0.46)                    |
| >1                                                                                           | 0.19(0.16,0.22)                    | 0.2(0.17,0.24)                     | 0.20(0.17,0.23)                        | 0.20(0.17,0.23)                     | 0.18(0.15,0.21)                    | 0.19(0.17,0.22)                    |

\* Questions posed in BRFSS on access, costs and satisfaction with care:

-Do you have one person you think of as your personal doctor or health care provider?

-In the past 12 months is there any time when you did not have any health insurance or coverage? (instability in insurance coverage)

-Was there a time in the past 12 months when you needed to see a doctor but could not because of cost? (difficulty seeing a doctor due to cost)

-In the past 12 months, was there a time when you did not take your prescription medications due to cost? (not taking Medication due to cost)

-Do you currently have any health care bills that are being paid off over time? (medical debt)

-In general, how satisfied are you with the care you received? Response categorization: Very satisfied versus somewhat satisfied/not satisfied (Very satisfied with care)

\*\*Adjusted for number of comorbid conditions, number of functional impairments and number of visits. Missing data was dropped from the analyses.

**eTable 4. Comparisons of Individually Purchased Private Insurance to Medicaid on Access to Care, Cost of Care and Satisfaction With Care After Accounting for Health Status\*, N = 29 556**

|                                                                                              | Access to Care                     |                                    | Costs of Care                          |                                     |                                    | Satisfaction with Care             |
|----------------------------------------------------------------------------------------------|------------------------------------|------------------------------------|----------------------------------------|-------------------------------------|------------------------------------|------------------------------------|
|                                                                                              | Has a personal doctor              | Instability in insurance coverage  | Difficulty seeing a doctor due to cost | Not taking medications due to costs | Reported medical debt              | Very satisfied with care***        |
| n                                                                                            | 29,438                             | 29,472                             | 29,483                                 | 27,391                              | 29,251                             | 28,881                             |
|                                                                                              | Unadjusted OR (95% CI)             |                                    |                                        |                                     |                                    |                                    |
|                                                                                              | Adjusted OR (95% CI) **            |                                    |                                        |                                     |                                    |                                    |
| Individually Purchased Private Insurance Compared to Medicaid                                | 1.13(0.99,1.29)<br>1.50(1.30,1.72) | 0.57(0.48,0.67)<br>0.59(0.49,0.70) | 0.66(0.58,0.76)<br>0.82(0.71,0.96)     | 0.64(0.55,0.75)<br>0.88(0.74,1.06)  | 1.28(1.13,1.46)<br>1.62(1.41,1.86) | 1.08(0.97,1.20)<br>0.98(0.87,1.10) |
|                                                                                              | Adjusted OR (95% CI)**             |                                    |                                        |                                     |                                    |                                    |
| <b>Self-Reported Health</b>                                                                  |                                    |                                    |                                        |                                     |                                    |                                    |
| Excellent/Very good/Good (reference)                                                         |                                    |                                    |                                        |                                     |                                    |                                    |
| Fair/poor                                                                                    | 0.56(0.48,0.64)                    | 0.55(0.48,0.63)                    | 0.57(0.49,0.65)                        | 0.55(0.48,0.64)                     | 0.55(0.48,0.64)                    | 0.55(0.47,0.63)                    |
| <b>Number of Visits to the Doctor, Nurse, or Other Health Professional in Past 12 Months</b> |                                    |                                    |                                        |                                     |                                    |                                    |
| None (reference)                                                                             |                                    |                                    |                                        |                                     |                                    |                                    |
| 1-2                                                                                          | 0.97(0.78,1.19)                    | 1.05(0.84,1.31)                    | 1.10(0.89,1.35)                        | 1.17(0.92,1.48)                     | 1.04(0.84,1.28)                    | 1.16(0.93,1.44)                    |
| >2                                                                                           | 0.72(0.59,0.89)                    | 0.80(0.65,0.99)                    | 0.84(0.68,1.03)                        | 0.89(0.7,1.11)                      | 0.76(0.62,0.94)                    | 0.89(0.72,1.10)                    |
| <b>Number of Comorbid Conditions</b>                                                         |                                    |                                    |                                        |                                     |                                    |                                    |
| None (reference)                                                                             |                                    |                                    |                                        |                                     |                                    |                                    |
| 1                                                                                            | 0.84(0.74,0.95)                    | 0.85(0.75,0.97)                    | 0.87(0.76,0.98)                        | 0.87(0.77,1)                        | 0.86(0.76,0.98)                    | 0.87(0.77,0.99)                    |
| 2                                                                                            | 1.15(0.96,1.38)                    | 1.16(0.97,1.4)                     | 1.20(1.00,1.44)                        | 1.2(1,1.45)                         | 1.17(0.98,1.40)                    | 1.20(1.00,1.44)                    |
| >2                                                                                           | 1.01(0.8,1.28)                     | 1.03(0.82,1.3)                     | 1.06(0.84,1.34)                        | 1.07(0.85,1.36)                     | 1.07(0.85,1.35)                    | 1.10(0.87,1.39)                    |
| <b>Number of Functional Impairments</b>                                                      |                                    |                                    |                                        |                                     |                                    |                                    |
| None (reference)                                                                             |                                    |                                    |                                        |                                     |                                    |                                    |
| 1                                                                                            | 0.55(0.48,0.64)                    | 0.58(0.5,0.67)                     | 0.56(0.49,0.65)                        | 0.57(0.49,0.66)                     | 0.55(0.48,0.64)                    | 0.56(0.49,0.65)                    |
| >1                                                                                           | 0.34(0.29,0.41)                    | 0.36(0.3,0.43)                     | 0.35(0.29,0.42)                        | 0.36(0.3,0.44)                      | 0.33(0.28,0.40)                    | 0.35(0.29,0.42)                    |

\* Questions posed in BRFSS on access, costs and satisfaction with care:

-Do you have one person you think of as your personal doctor or health care provider?

-In the past 12 months is there any time when you did not have any health insurance or coverage? (instability in insurance coverage)

-Was there a time in the past 12 months when you needed to see a doctor but could not because of cost? (difficulty seeing a doctor due to cost)

-In the past 12 months, was there a time when you did not take your prescription medications due to cost? (not taking Medication due to cost)

-Do you currently have any health care bills that are being paid off over time? (medical debt)

-In general, how satisfied are you with the care you received? Response categorization: Very satisfied versus somewhat satisfied/not satisfied (Very satisfied with care)

\*\*Adjusted for number of comorbid conditions, number of functional impairments and number of visits. Missing data was dropped from the analyses.

**eTable 5. Comparison Employer Sponsored Health Insurance to VA/Military on Access, Cost and Satisfaction With Care After Accounting for Health Status\*, N = 70 992**

|                                                                                              | Access to Care                    |                                    | Costs of Care                          |                                     |                                   | Satisfaction with Care             |
|----------------------------------------------------------------------------------------------|-----------------------------------|------------------------------------|----------------------------------------|-------------------------------------|-----------------------------------|------------------------------------|
|                                                                                              | Has a personal doctor             | Instability in insurance coverage  | Difficulty seeing a doctor due to cost | Not taking medications due to costs | Reported medical debt             | Very satisfied with care***        |
| N**                                                                                          | 70,784                            | 70,853                             | 70,839                                 | 65,334                              | 70,577                            | 69,652                             |
| Unadjusted OR (95% CI)                                                                       |                                   |                                    |                                        |                                     |                                   |                                    |
| Adjusted OR (95% CI) **                                                                      |                                   |                                    |                                        |                                     |                                   |                                    |
| Employer Sponsored Health Insurance to VA/Military                                           | 1.13(0.97,1.3)<br>1.43(1.21,1.68) | 1.37(0.97,1.93)<br>1.41(0.98,2.03) | 1.48(1.17,1.86)<br>2.21(1.71,2.84)     | 1.68(1.19,2.38)<br>2.99(2.07,4.33)  | 2.25(1.9,2.67)<br>3.09(2.58,3.71) | 0.83(0.73,0.95)<br>0.73(0.64,0.83) |
| Adjusted OR (95% CI)**                                                                       |                                   |                                    |                                        |                                     |                                   |                                    |
| <b>Self-Reported Health</b>                                                                  |                                   |                                    |                                        |                                     |                                   |                                    |
| Excellent/Very good/Good (reference)                                                         |                                   |                                    |                                        |                                     |                                   |                                    |
| Fair/poor                                                                                    | 0.75(0.63,0.9)                    | 0.74(0.62,0.88)                    | 0.72(0.60,0.86)                        | 0.76(0.63,0.9)                      | 0.69(0.57,0.83)                   | 0.71(0.59,0.85)                    |
| <b>Number of Visits to the Doctor, Nurse, or Other Health Professional in Past 12 Months</b> |                                   |                                    |                                        |                                     |                                   |                                    |
| None (reference)                                                                             |                                   |                                    |                                        |                                     |                                   |                                    |
| 1-2                                                                                          | 0.64(0.49,0.84)                   | 0.69(0.53,0.9)                     | 0.72(0.55,0.93)                        | 0.75(0.57,0.98)                     | 0.69(0.53,0.89)                   | 0.69(0.53,0.89)                    |
| >2                                                                                           | 0.65(0.50,0.84)                   | 0.72(0.57,0.92)                    | 0.74(0.58,0.95)                        | 0.79(0.61,1.02)                     | 0.67(0.52,0.85)                   | 0.67(0.52,0.85)                    |
| <b>Number of Comorbid Conditions</b>                                                         |                                   |                                    |                                        |                                     |                                   |                                    |
| None (reference)                                                                             |                                   |                                    |                                        |                                     |                                   |                                    |
| 1                                                                                            | 0.98(0.86,1.13)                   | 1(0.87,1.14)                       | 0.99(0.87,1.14)                        | 0.93(0.81,1.07)                     | 0.98(0.86,1.13)                   | 0.99(0.86,1.14)                    |
| 2                                                                                            | 0.66(0.56,0.79)                   | 0.69(0.58,0.83)                    | 0.69(0.58,0.82)                        | 0.64(0.54,0.77)                     | 0.67(0.56,0.8)                    | 0.70(0.58,0.83)                    |
| >2                                                                                           | 0.36(0.28,0.46)                   | 0.38(0.29,0.49)                    | 0.39(0.30,0.50)                        | 0.34(0.26,0.43)                     | 0.36(0.28,0.47)                   | 0.39(0.30,0.50)                    |
| <b>Number of Functional Impairments</b>                                                      |                                   |                                    |                                        |                                     |                                   |                                    |
| None (reference)                                                                             |                                   |                                    |                                        |                                     |                                   |                                    |
| 1                                                                                            | 0.52(0.43,0.63)                   | 0.51(0.42,0.62)                    | 0.49(0.40,0.59)                        | 0.48(0.4,0.58)                      | 0.48(0.4,0.58)                    | 0.50(0.41,0.60)                    |
| >1                                                                                           | 0.29(0.24,0.36)                   | 0.29(0.24,0.36)                    | 0.26(0.21,0.32)                        | 0.25(0.2,0.31)                      | 0.25(0.21,0.32)                   | 0.28(0.23,0.35)                    |

\* Questions posed in BRFSS on access, costs and satisfaction with care:

-Do you have one person you think of as your personal doctor or health care provider?

-In the past 12 months is there any time when you did not have any health insurance or coverage? (instability in insurance coverage)

-Was there a time in the past 12 months when you needed to see a doctor but could not because of cost? (difficulty seeing a doctor due to cost)

-In the past 12 months, was there a time when you did not take your prescription medications due to cost? (not taking Medication due to cost)

-Do you currently have any health care bills that are being paid off over time? (medical debt)

-In general, how satisfied are you with the care you received? Response categorization: Very satisfied versus somewhat satisfied/not satisfied (Very satisfied with care)

\*\*Adjusted for number of comorbid conditions, number of functional impairments and number of visits. Missing data was dropped from the analyses.

**eTable 6. Comparisons of Individually purchased Private Insurance to VA/Military on Access to Care, Cost of Care and Satisfaction With Care After Accounting for Health Status\*, N = 22 986**

|                                                                                              | Access to Care                     |                                    | Costs of Care                          |                                     |                                    | Satisfaction with Care             |
|----------------------------------------------------------------------------------------------|------------------------------------|------------------------------------|----------------------------------------|-------------------------------------|------------------------------------|------------------------------------|
|                                                                                              | Has a personal doctor              | Instability in insurance coverage  | Difficulty seeing a doctor due to cost | Not taking medications due to costs | Reported medical debt              | Very satisfied with care***        |
| N**                                                                                          | 22,814                             | 22,861                             | 22,862                                 | 21,158                              | 22,714                             | 22,395                             |
|                                                                                              | Unadjusted OR (95% CI)             |                                    |                                        |                                     |                                    |                                    |
|                                                                                              | Adjusted OR (95% CI) **            |                                    |                                        |                                     |                                    |                                    |
| Individually Purchased Private Insurance Compared to VA/Military                             | 1.07(0.91,1.26)<br>1.35(1.13,1.62) | 2.65(1.85,3.81)<br>2.38(1.65,3.44) | 1.94(1.52,2.47)<br>2.17(1.68,2.80)     | 2.52(1.76,3.62)<br>3.31(2.29,4.78)  | 2.12(1.76,2.55)<br>2.52(2.07,3.06) | 0.74(0.65,0.85)<br>0.72(0.62,0.83) |
|                                                                                              | Adjusted OR (95% CI)**             |                                    |                                        |                                     |                                    |                                    |
| <b>Self-Reported Health</b>                                                                  |                                    |                                    |                                        |                                     |                                    |                                    |
| Excellent/Very good/Good (reference)                                                         |                                    |                                    |                                        |                                     |                                    |                                    |
| Fair/poor                                                                                    | 1(0.82,1.21)                       | 0.99(0.82,1.2)                     | 0.97(0.8,1.18)                         | 1.00(0.82,1.21)                     | 0.96(0.79,1.17)                    | 0.95(0.78,1.16)                    |
| <b>Number of Visits to the Doctor, Nurse, or Other Health Professional in Past 12 Months</b> |                                    |                                    |                                        |                                     |                                    |                                    |
| None (reference)                                                                             |                                    |                                    |                                        |                                     |                                    |                                    |
| 1-2                                                                                          | 0.58(0.43,0.78)                    | 0.63(0.48,0.84)                    | 0.65(0.49,0.86)                        | 0.7(0.52,0.94)                      | 0.62(0.47,0.82)                    | 0.68(0.52,0.88)                    |
| >2                                                                                           | 0.58(0.44,0.77)                    | 0.65(0.50,0.85)                    | 0.65(0.50,0.85)                        | 0.7(0.53,0.93)                      | 0.59(0.45,0.77)                    | 0.7(0.54,0.89)                     |
| <b>Number of Comorbid Conditions</b>                                                         |                                    |                                    |                                        |                                     |                                    |                                    |
| None (reference)                                                                             |                                    |                                    |                                        |                                     |                                    |                                    |
| 1                                                                                            | 0.85(0.73,0.99)                    | 0.87(0.75,1.01)                    | 0.86(0.74,1.01)                        | 0.82(0.7,0.96)                      | 0.86(0.74,1.01)                    | 0.87(0.74,1.02)                    |
| 2                                                                                            | 0.78(0.64,0.96)                    | 0.82(0.67,1)                       | 0.81(0.66,0.99)                        | 0.75(0.61,0.92)                     | 0.77(0.63,0.95)                    | 0.82(0.67,1.01)                    |
| >2                                                                                           | 0.43(0.33,0.57)                    | 0.47(0.35,0.62)                    | 0.47(0.36,0.63)                        | 0.4(0.3,0.54)                       | 0.44(0.33,0.58)                    | 0.46(0.35,0.61)                    |
| <b>Number of Functional Impairments</b>                                                      |                                    |                                    |                                        |                                     |                                    |                                    |
| None (reference)                                                                             |                                    |                                    |                                        |                                     |                                    |                                    |
| 1                                                                                            | 0.73(0.6,0.89)                     | 0.72(0.59,0.88)                    | 0.7(0.57,0.86)                         | 0.67(0.55,0.82)                     | 0.71(0.58,0.87)                    | 0.72(0.58,0.88)                    |
| >1                                                                                           | 0.55(0.44,0.69)                    | 0.55(0.44,0.7)                     | 0.5(0.4,0.63)                          | 0.5(0.39,0.63)                      | 0.5(0.4,0.64)                      | 0.54(0.43,0.68)                    |

\* Questions posed in BRFSS on access, costs and satisfaction with care:

-Do you have one person you think of as your personal doctor or health care provider?

-In the past 12 months is there any time when you did not have any health insurance or coverage? (instability in insurance coverage)

-Was there a time in the past 12 months when you needed to see a doctor but could not because of cost? (difficulty seeing a doctor due to cost)

-In the past 12 months, was there a time when you did not take your prescription medications due to cost? (not taking Medication due to cost)

-Do you currently have any health care bills that are being paid off over time? (medical debt)

-In general, how satisfied are you with the care you received? Response categorization: Very satisfied versus somewhat satisfied/not satisfied (Very satisfied with care)

\*\*Adjusted for number of comorbid conditions, number of functional impairments and number of visits. Missing data was dropped from the analyses.
